# Supplementary material for: Highly active and regioselective hydroaminomethylation of olefins catalyzed by Rh/sulfoxantphos with ZSM-5
Source: Royal Society of Chemistry journal article supplement (doi:10.1039/d4cc00663a), 2024-01-01
Supplement: d4cc00663a1.pdf [file d4cc00663a1.pdf]

## Supporting Information for

### Highly active and regioselective hydroaminomethylation of olefins catalyzed by Rh/sulfoxantphos with ZSM-5

Xiaoshuang Yuan,<sup>‡a</sup> Xueqing Zhang,<sup>‡a</sup> Shuxiang Dong<sup>b</sup>, Shuhui Sun<sup>c</sup> and Xiaofei Jia<sup>\*a</sup>

<sup>a</sup>Key Laboratory of Optic-electric Sensing and Analytical Chemistry for Life Science, MOE, College of Chemistry and Molecular Engineering, Qingdao University of Science and Technology, Qingdao 266042, P. R. China.

<sup>b</sup>Liaoning Sino More New Material Co., Ltd., Panjin, 124000, P. R. China.

<sup>c</sup>Xianhe Oil Production Plant, SINOPEC, Dongying, 257000, P. R. China.

|                                                                                              |           |
|----------------------------------------------------------------------------------------------|-----------|
| <b>1. General methods .....</b>                                                              | <b>2</b>  |
| <b>2. General procedure for hydroaminomethylation of olefins. ....</b>                       | <b>2</b>  |
| <b>3. Adsorption experiment of morpholine and ZSM-5 .....</b>                                | <b>3</b>  |
| <b>4. The preparation and characterization of [Rh] species .....</b>                         | <b>3</b>  |
| <b>5. The GC spectrum for hydroaminomethylation reaction of 1-hexene and morpholine.....</b> | <b>4</b>  |
| <b>6. Characterization data for the products .....</b>                                       | <b>4</b>  |
| <b>7. NMR spectra of products .....</b>                                                      | <b>9</b>  |
| <b>References:.....</b>                                                                      | <b>17</b> |

## 1. General methods

Unless otherwise noted, all manipulations involving air or moisture-sensitive compounds were performed in a nitrogen-filled glovebox or using standard Schlenk techniques. Solvents were dried according to standard procedures.  $^1\text{H}$  NMR spectra were recorded on 400 MHz by using a Bruker Avance 400 spectrometer. Chemical shifts ( $\delta$  values) were reported in ppm with internal TMS ( $^1\text{H}$  NMR),  $\text{CDCl}_3$  ( $^{13}\text{C}$  NMR). GC analyses were measured on an Agilent 7820A system using an FID detector. HRMS analyses were measured on Waters Synapt G2Si HDMS.

## 2. General procedure for hydroaminomethylation of olefins.

In a glove box, an autoclave with a magnetic stirring bar was charged with  $\text{Rh}(\text{acac})(\text{CO})_2$  (0.083 mg,  $3.2 \times 10^{-4}$  mmol), sulfoxantphos (0.96 mg,  $1.3 \times 10^{-3}$  mmol) and toluene/EtOH (1:1, 2.0 mL). The mixture was stirred for 5 min. Then olefin (1.6 mmol), amine (1.6 mmol) and ZSM-5 (75 mg) were added to the autoclave. The mixture was purged with hydrogen for three times and subsequently charged with CO (10 bar) and  $\text{H}_2$  (15 bar). The autoclave was then heated to 120 °C (oil bath) and was kept at this temperature for 10 h. The autoclave was cooled in ice water, and the gas was carefully released in a well-ventilated hood. The mixture subsequently was analyzed by gas chromatography (GC). Then the mixture was purified by flash column chromatography on silica gel to afford the product amine.

### 3. Adsorption experiment of morpholine and ZSM-5

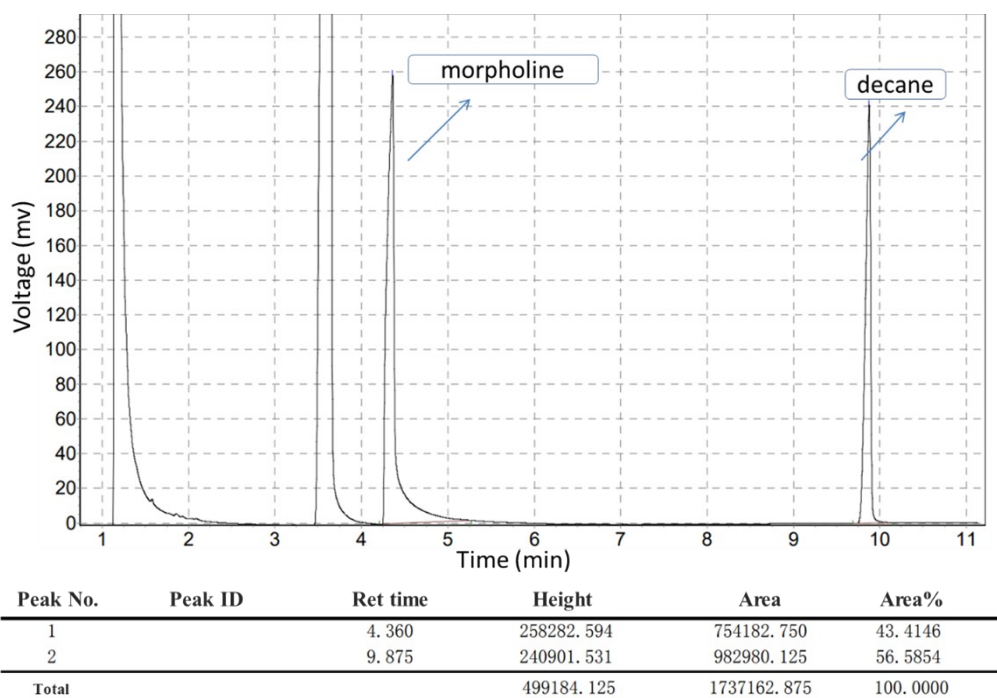

Fig. S1. The GC spectrum of morpholine (90  $\mu$ L), decane (20  $\mu$ L) in toluene and EtOH

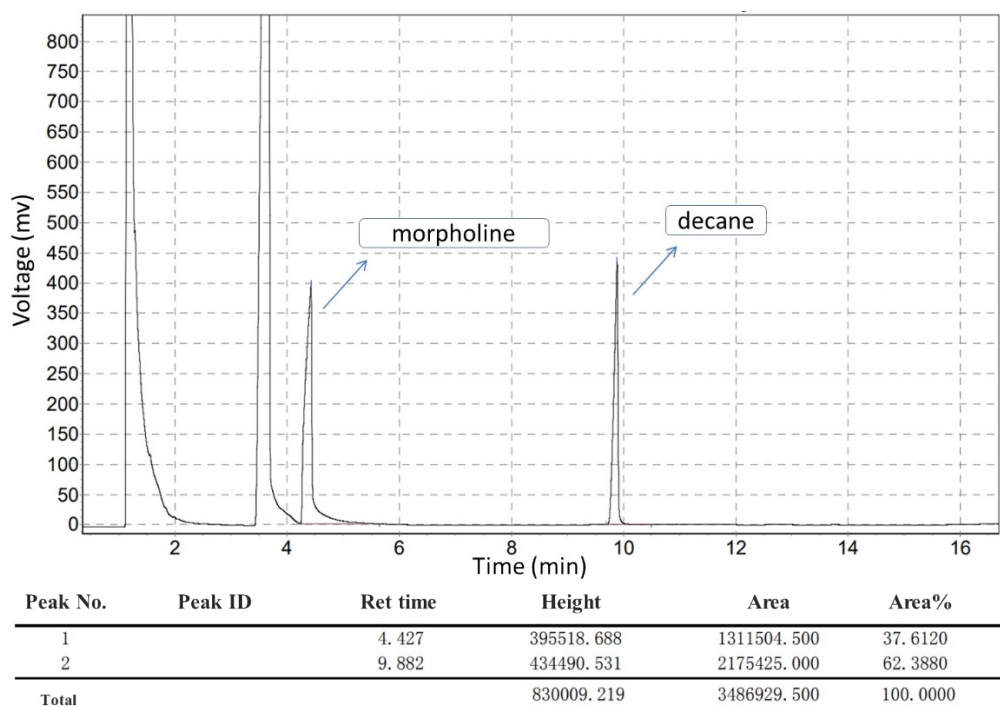

Fig. S2. The GC spectrum of morpholine (90  $\mu$ L), decane (20  $\mu$ L) and ZSM-5 (75 mg) in toluene and EtOH (the mixture was detected after stirring for 30 minutes at room temperature)

### 4. The preparation and characterization of [Rh] species

In a glove box, a glass vial with a magnetic stirring bar was charged with

sulfoxantphos (5.9 mg, 0.008 mmol) and Rh(acac)(CO)<sub>2</sub> (2.1 mg, 0.008 mmol) in toluene (1.0 mL) and MeOH (0.2 mL). The mixture was transferred to an autoclave, which was purged with nitrogen three times and subsequently charged with CO (10 bar) and H<sub>2</sub> (10 bar). The autoclave was then heated to 40 °C (oil bath) for 10 h. The autoclave was cooled to room temperature, and the gas was carefully released in a well-ventilated hood. The reaction mixture was immediately analyzed by HRMS. HRMS (ESI) m/z: Calcd. For C<sub>43</sub>H<sub>38</sub>O<sub>9</sub>P<sub>2</sub>RhS<sub>2</sub><sup>+</sup>: 927.0482, Found: 927.4387 (M+H<sup>+</sup>).

## 5. The GC spectrum for hydroaminomethylation reaction of 1-hexene and morpholine

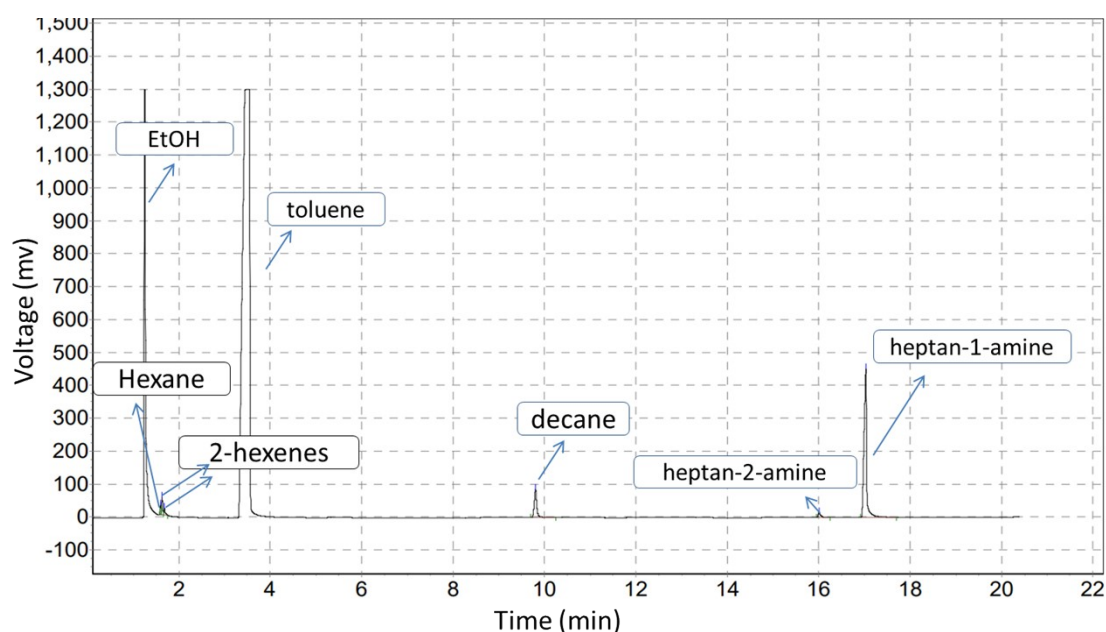

## 6. Characterization data for the products

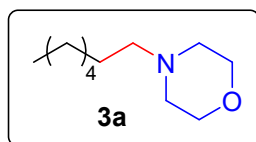

**4-Heptylmorpholine (3a)**<sup>[1]</sup>: colorless liquid, 266.4 mg, 90% yield. <sup>1</sup>H NMR (400 MHz, CDCl<sub>3</sub>): δ 3.61 (t, *J* = 4.8 Hz, 4H), 2.32 (t, *J* = 4.8 Hz, 4H), 2.23-2.19 (m, 2H), 1.40-1.36 (m, 2H), 1.22-1.67 (m, 8H), 0.78 (t, *J* = 7.2 Hz, 3H) ppm.

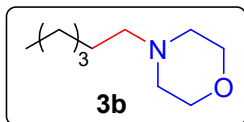

**4-Hexylmorpholine (3b)**<sup>[2]</sup>: colorless liquid, 259.9 mg, 95% yield. **<sup>1</sup>H NMR** (400 MHz, CDCl<sub>3</sub>): δ 3.66 (t, *J* = 4.4 Hz, 4H), 2.38 (s, 4H), 2.26 (t, *J* = 7.6 Hz, 2H), 1.44-1.39 (m, 2H), 1.26-1.24 (m, 6H), 0.83 (t, *J* = 6.0 Hz, 3H) ppm.

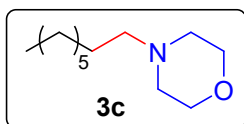

**4-Octylmorpholine (3c)**<sup>[3]</sup>: colorless liquid, 290 mg, 91% yield. **<sup>1</sup>H NMR** (400 MHz, CDCl<sub>3</sub>): δ 3.63 (t, *J* = 4.4 Hz, 4H), 2.36-2.33 (m, 4H), 2.25-2.21 (m, 2H), 1.42-1.38 (m, 2H), 1.21-1.78 (m, 10H), 0.80 (t, *J* = 6.0 Hz, 3H) ppm.

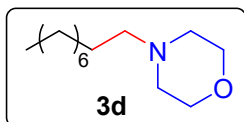

**4-Nonylmorpholine (3d)**<sup>[4]</sup>: colorless liquid, 299.9 mg, 88% yield. **<sup>1</sup>H NMR** (400 MHz, CDCl<sub>3</sub>): δ 3.68 (t, *J* = 4.4 Hz, 4H), 2.40-2.38 (m, 4H), 2.73 (t, *J* = 7.6 Hz, 2H), 1.46-1.42 (m, 2H), 1.24-1.22 (m, 12H), 0.84 (t, *J* = 6.0 Hz, 3H) ppm.

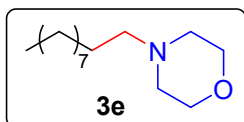

**4-Decylmorpholine (3e)**<sup>[5]</sup>: colorless liquid, 312.4 mg, 86% yield. **<sup>1</sup>H NMR** (400 MHz, CDCl<sub>3</sub>): δ 3.68 (t, *J* = 4.4 Hz, 4H), 2.40-2.38 (m, 4H), 2.29-2.26 (m, 2H), 1.46-1.43 (m, 2H), 1.25-1.22 (m, 14H), 0.84 (t, *J* = 5.6 Hz, 3H) ppm.

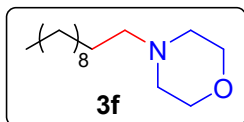

**4-Undecylmorpholine (3f)**<sup>[6]</sup>: colorless liquid, 354.8 mg, 92% yield. **<sup>1</sup>H NMR** (400 MHz, CDCl<sub>3</sub>): δ 3.59 (t, *J* = 4.8 Hz, 4H), 2.32-2.30 (m, 4H), 2.20 (t, *J* = 7.6 Hz, 2H), 1.38-1.35 (m, 2H), 1.17-1.15 (m, 16H), 0.76 (t, *J* = 6.4 Hz, 3H) ppm.

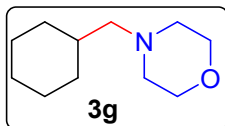

**4-(Cyclohexylmethyl)morpholine (3g)**<sup>[7]</sup>: colorless liquid, 222.5 mg, 76% yield. <sup>1</sup>H NMR (400 MHz, CDCl<sub>3</sub>): δ 3.70 (t, *J* = 4.8 Hz, 4H), 2.39-2.37 (m, 4H), 2.11 (d, *J* = 7.2 Hz, 2H), 1.77-1.67 (m, 4H), 1.50-1.47 (m, 1H), 1.26-1.16 (m, 4H), 0.88-0.84 (m, 2H) ppm.

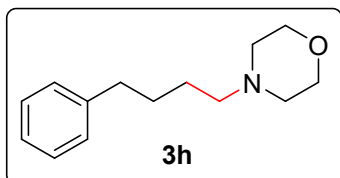

**4-(4-Phenylbutyl)morpholine (3h)**<sup>[8]</sup>: colorless oil, 318.9 mg, 91% yield. <sup>1</sup>H NMR (400 MHz, CDCl<sub>3</sub>): δ 7.28-7.25 (m, 2H), 7.17-7.16 (m, 3H), 3.70 (t, *J* = 3.6 Hz, 4H), 2.62 (t, *J* = 6.0 Hz, 2H), 2.41-2.39 (m, 4H), 2.34 (t, *J* = 6.0 Hz, 2H), 1.65-1.62 (m, 2H), 1.53-1.50 (m, 2H) ppm.

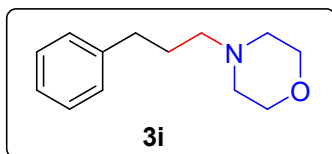

**4-(3-Phenylpropyl)morpholine (3i)**<sup>[7]</sup>: colorless oil, 233.1 mg, 71% yield. <sup>1</sup>H NMR (400 MHz, CDCl<sub>3</sub>): δ 7.29-7.26 (m, 2H), 7.19-7.18 (m, 3H), 3.71 (t, *J* = 4.0 Hz, 4H), 2.64 (t, *J* = 4.0 Hz, 2H), 2.44-2.42 (m, 4H), 2.36 (t, *J* = 6.0 Hz, 2H), 1.85-1.79 (m, 2H), ppm.

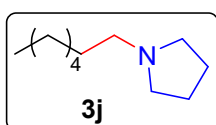

**1-Heptylpyrrolidine (3j)**<sup>[9]</sup>: colorless liquid, 219.0 mg, 81% yield. <sup>1</sup>H NMR (400 MHz, CDCl<sub>3</sub>): δ 2.46 (m, 4H), 2.38 (t, *J* = 8.0 Hz, 2H), 1.74-1.73 (m, 4H), 1.49-1.45 (m, 2H), 1.25-1.23 (m, 8H), 0.83 (t, *J* = 5.2 Hz, 3H) ppm.

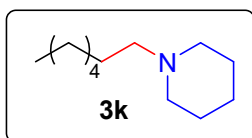

**1-Heptylpiperidine (3k)**<sup>[1]</sup>: colorless oil, 228.4 mg, 78% yield. <sup>1</sup>H NMR (400 MHz, CDCl<sub>3</sub>): δ 2.46 (m, 4H), 2.38 (t, *J* = 8.0 Hz, 2H), 1.74-1.73 (m, 4H), 1.49-1.45 (m, 2H), 1.25-1.23 (m, 8H), 0.83 (t, *J* = 5.2 Hz, 3H) ppm.

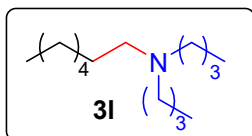

**N,N-dibutylheptan-1-amine (3l)**<sup>[10]</sup>: colorless liquid, 261.5 mg, 72% yield. <sup>1</sup>H NMR (400 MHz, CDCl<sub>3</sub>): δ 2.39-2.34 (m, 6H), 1.41-1.37 (m, 6H), 1.30-1.24 (m, 12H), 0.91-0.86 (m, 9H) ppm.

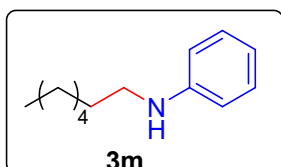

**N-heptylaniline (3m)**<sup>[11]</sup>: colorless oil, 271.9 mg, 89% yield. <sup>1</sup>H NMR (400 MHz, CDCl<sub>3</sub>): δ 7.14 (t, *J* = 8.0 Hz, 2H), 6.68-6.55 (m, 3H), 3.50 (s, br, 1H), 3.05 (t, *J* = 6.8 Hz, 2H), 1.58-1.55 (m, 2H), 1.33-1.29 (m, 8H), 0.89 (t, *J* = 6.0 Hz, 3H) ppm.

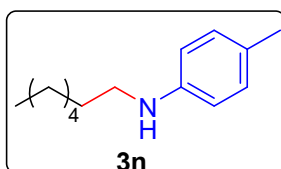

**N-heptyl-4-methylaniline (3n)**<sup>[12]</sup>: colorless oil, 285.4 mg, 87% yield. <sup>1</sup>H NMR (400 MHz, CDCl<sub>3</sub>): δ 7.01 (d, *J* = 6.4 Hz, 2H), 6.55 (d, *J* = 6.4 Hz, 2H), 3.47 (s, br, 1H), 3.09 (t, *J* = 5.6 Hz, 2H), 2.26 (s, 3H), 1.64-1.59 (m, 2H), 1.37-1.30 (m, 8H), 0.92 (t, *J* = 5.6 Hz, 3H) ppm.

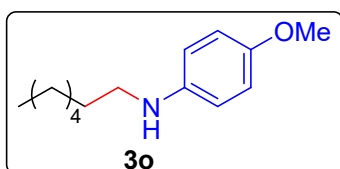

**N-heptyl-4-methoxyaniline (3o)**<sup>[13]</sup>: colorless oil, 297.0 mg, 84% yield. <sup>1</sup>H NMR (400 MHz, CDCl<sub>3</sub>): δ 6.79 (d, *J* = 7.2 Hz, 2H), 6.58 (d, *J* = 7.2 Hz, 2H), 3.76 (s, br, 1H), 3.75 (s, 3H), 3.06 (t, *J* = 5.6 Hz, 2H), 1.62-1.59 (m, 2H), 1.41-1.30 (m, 8H), 0.90 (t, *J* = 5.6 Hz, 3H) ppm.

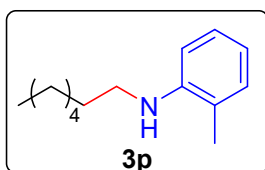

**N-heptyl-2-methylaniline (3p)**<sup>[14]</sup>: red brown oil, 272.2 mg, 83% yield. <sup>1</sup>H NMR (400 MHz, CDCl<sub>3</sub>): δ 7.16-7.13 (m, 1H), 7.07-7.06 (m, 1H), 6.68-6.62 (m, 2H), 3.49 (s, br,

1H), 3.16 (t,  $J = 5.6$  Hz, 2H), 2.15 (s, 3H), 1.70-1.67 (m, 2H), 1.44-1.32 (m, 8H), 0.92 (t,  $J = 5.2$  Hz, 3H) ppm.

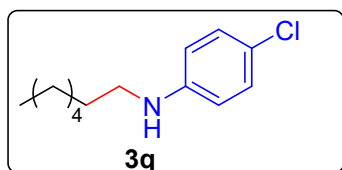

**4-Chloro-N-heptylaniline (3q)**<sup>[14]</sup>: pale yellow oil, 320.4 mg, 89% yield. **<sup>1</sup>H NMR** (400 MHz, CDCl<sub>3</sub>):  $\delta$  7.12 (d,  $J = 6.8$  Hz, 2H), 6.52 (d,  $J = 6.8$  Hz, 2H), 3.55 (s, br, 1H), 3.07 (t,  $J = 6.0$  Hz, 2H), 1.63-1.58 (m, 2H), 1.38-1.31 (m, 8H), 0.93-0.91 (m, 3H) ppm.

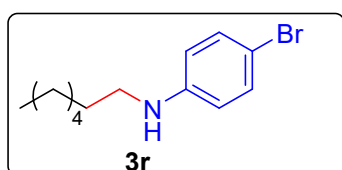

**4-Bromo-N-heptylaniline (3r)**<sup>[14]</sup>: pale yellow oil, 374.4 mg, 87% yield. **<sup>1</sup>H NMR** (400 MHz, CDCl<sub>3</sub>):  $\delta$  7.22 (d,  $J = 6.8$  Hz, 2H), 6.45 (d,  $J = 6.8$  Hz, 2H), 3.59 (s, br, 1H), 3.05 (t,  $J = 5.6$  Hz, 2H), 1.60-1.57 (m, 2H), 1.32-1.26 (m, 8H), 0.90-0.87 (m, 3H) ppm.



## 7. NMR spectra of products

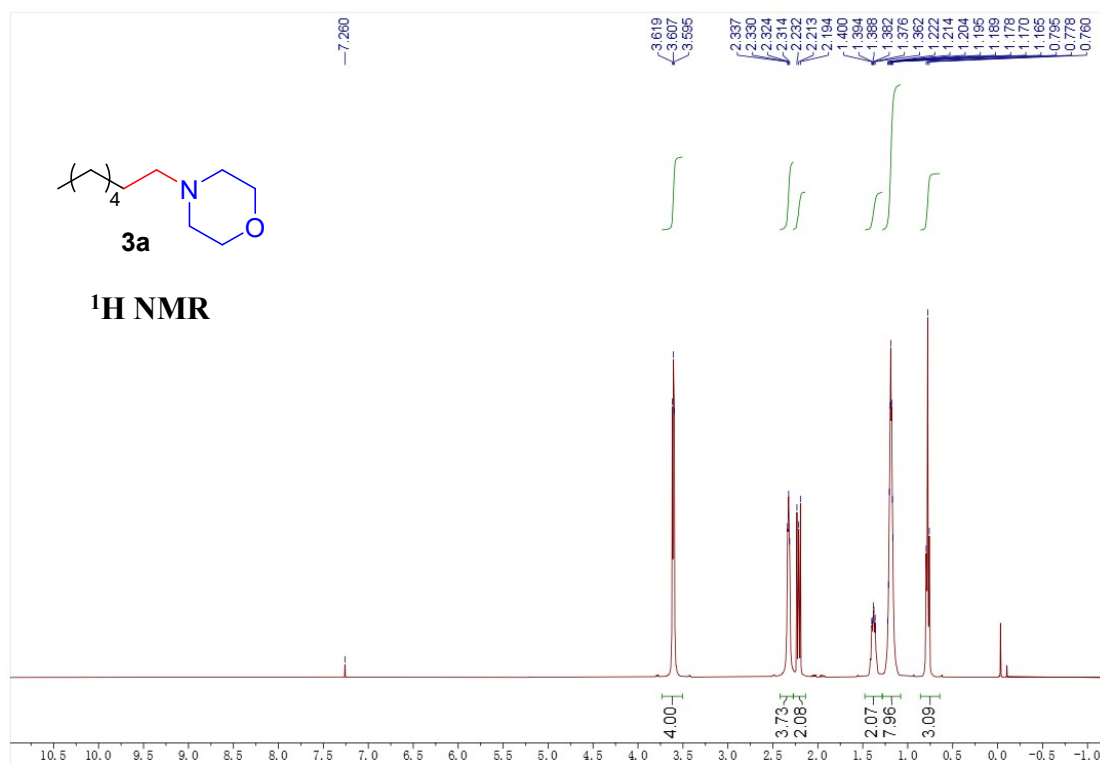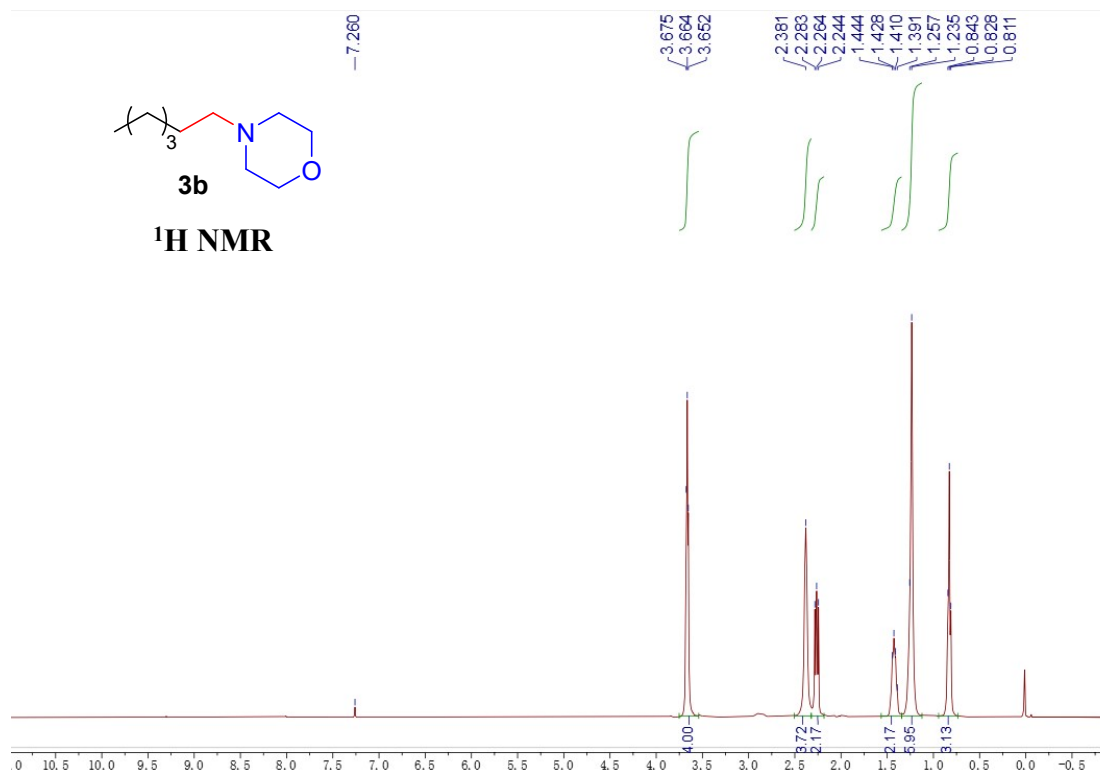

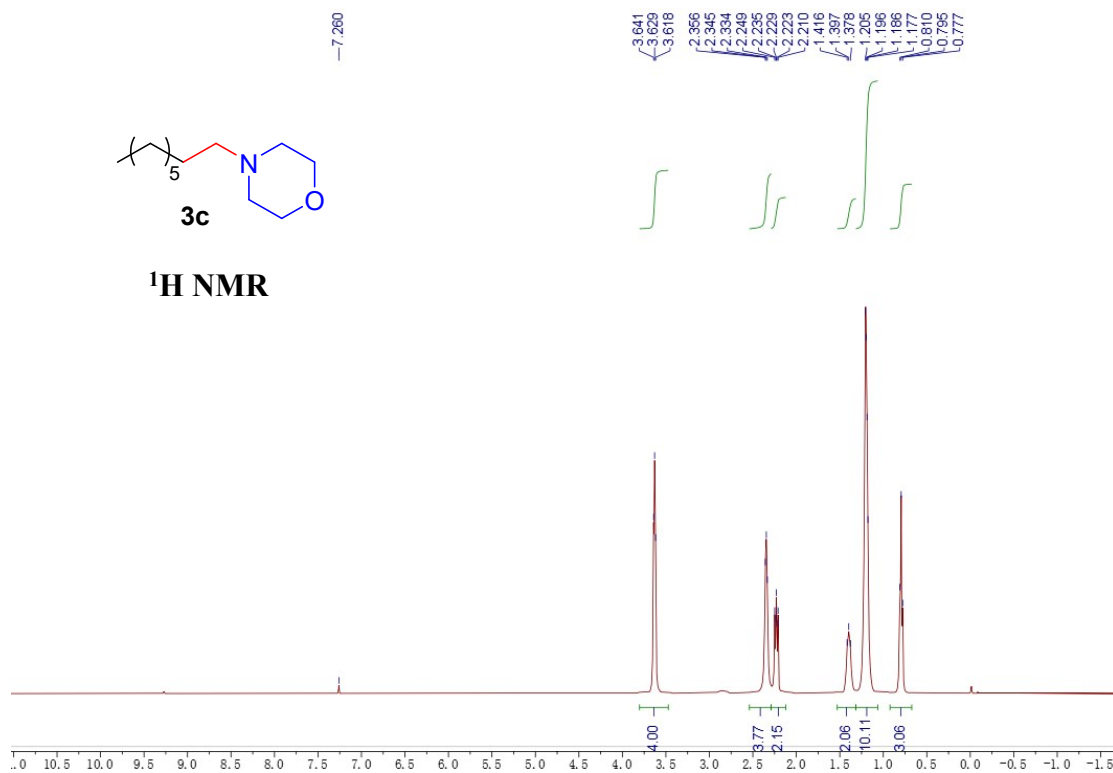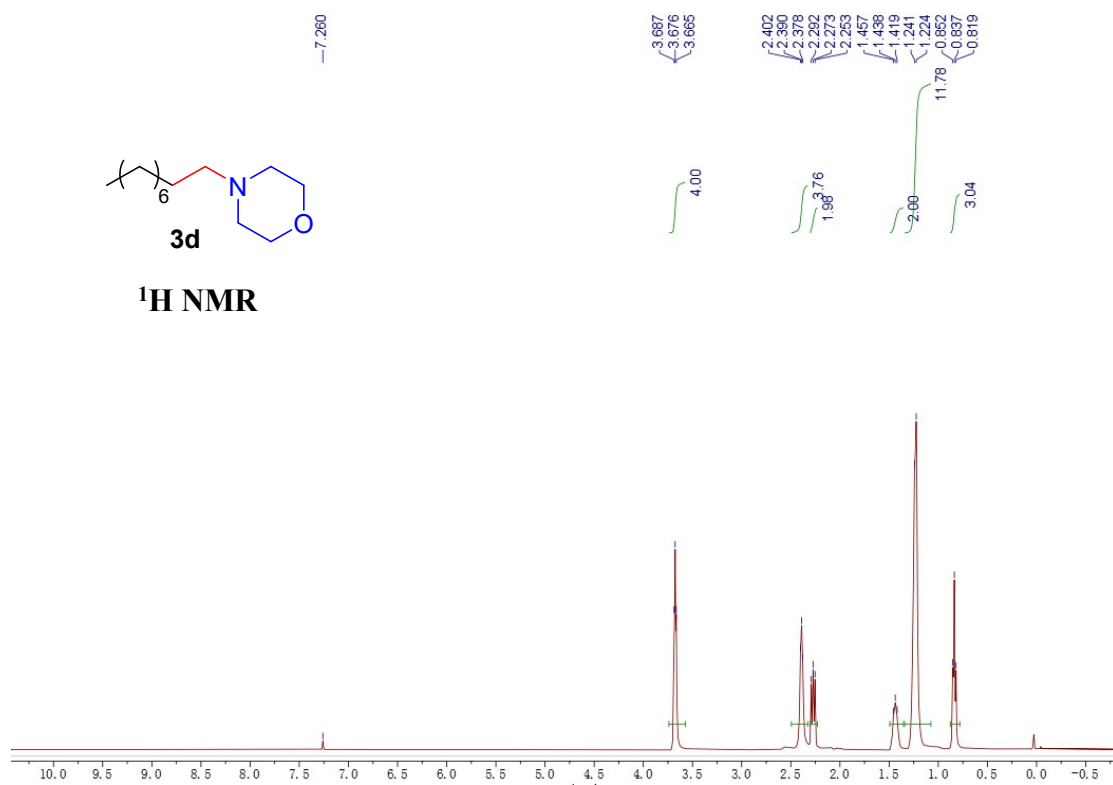

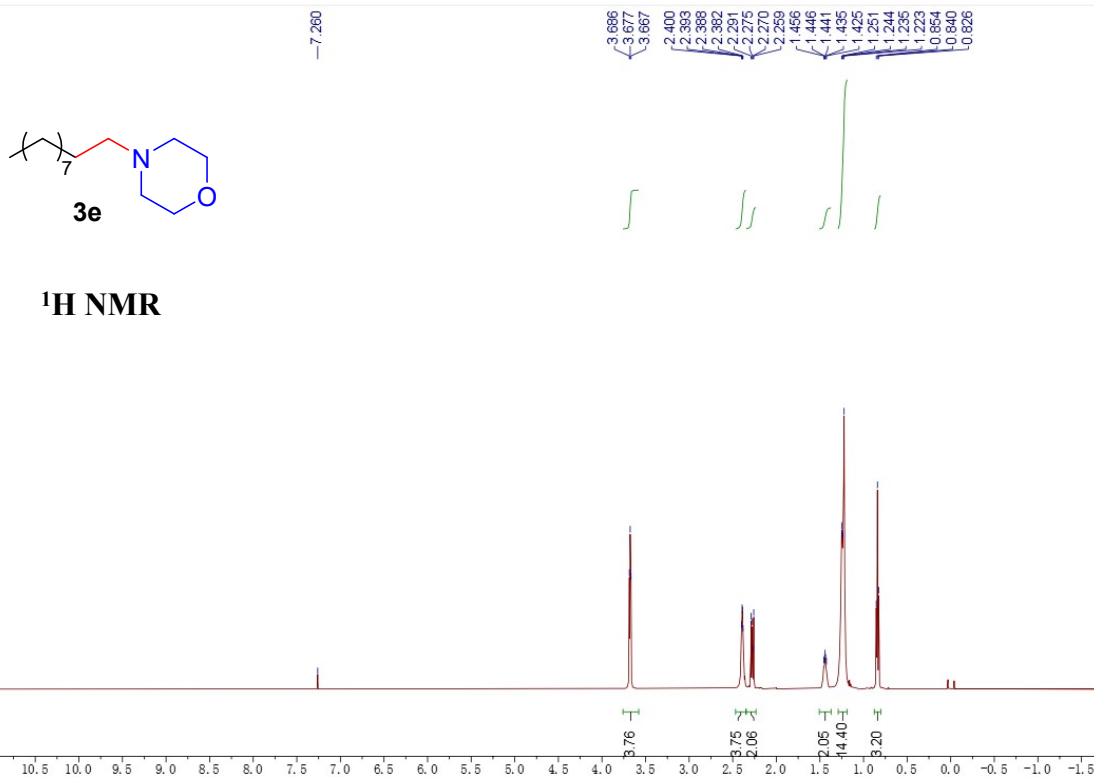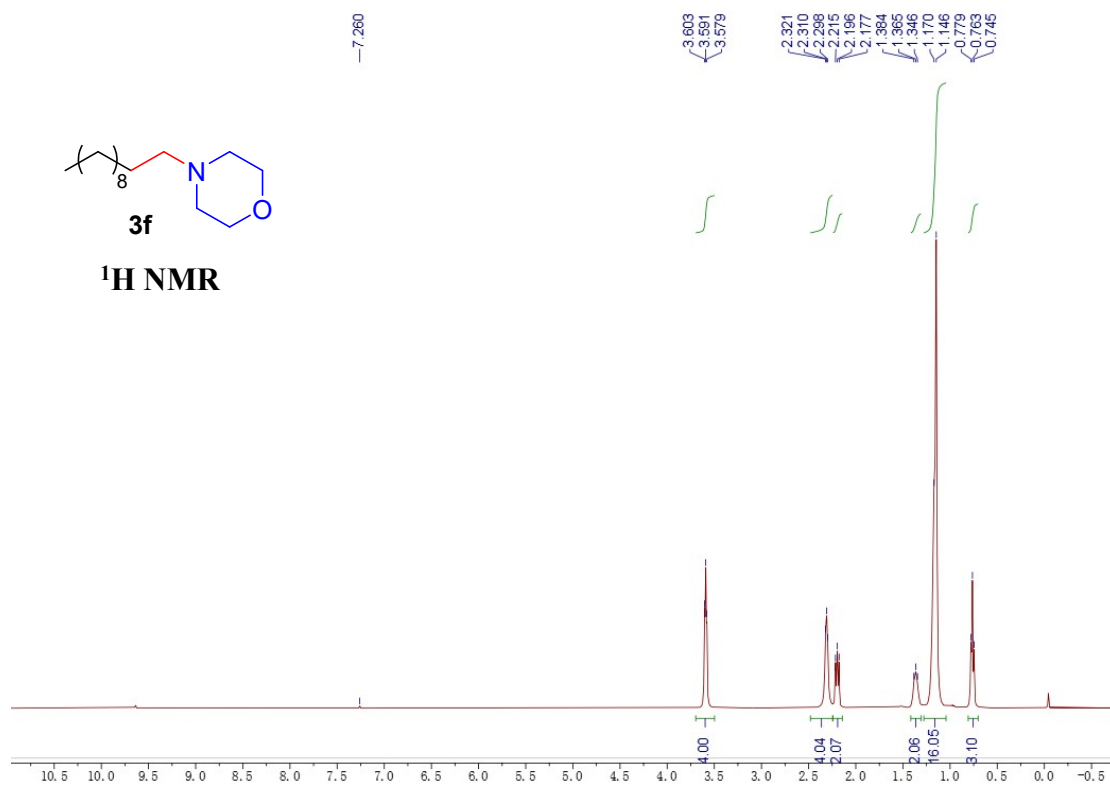

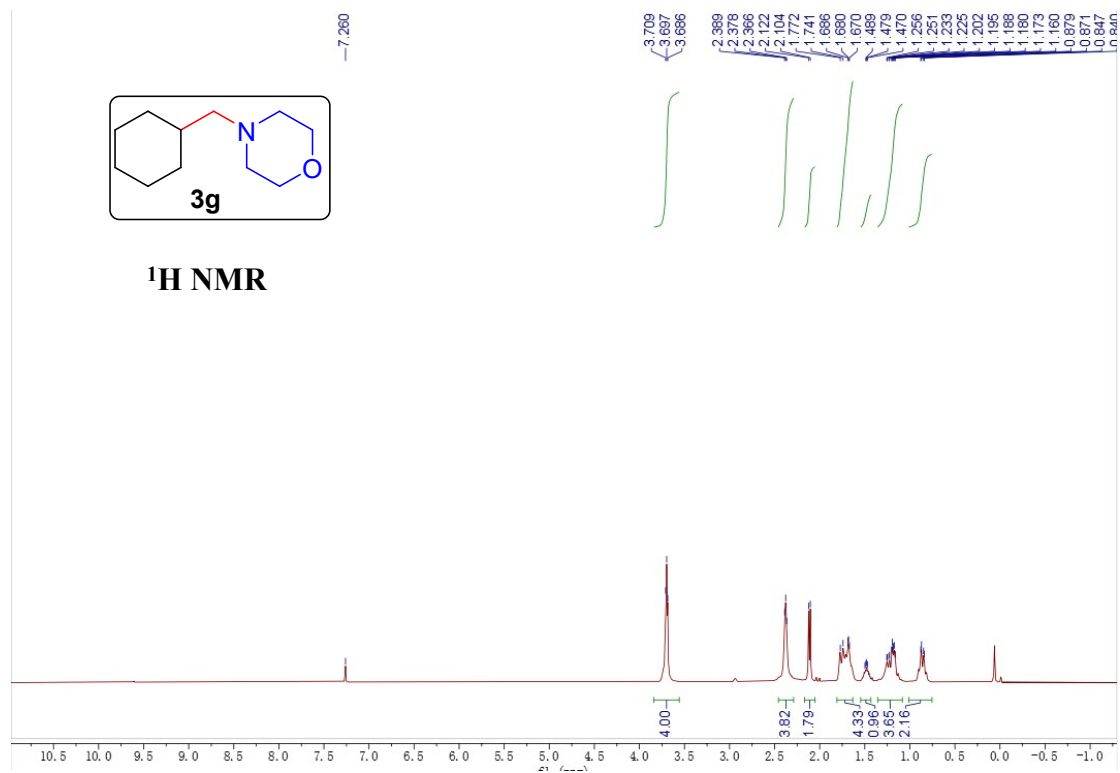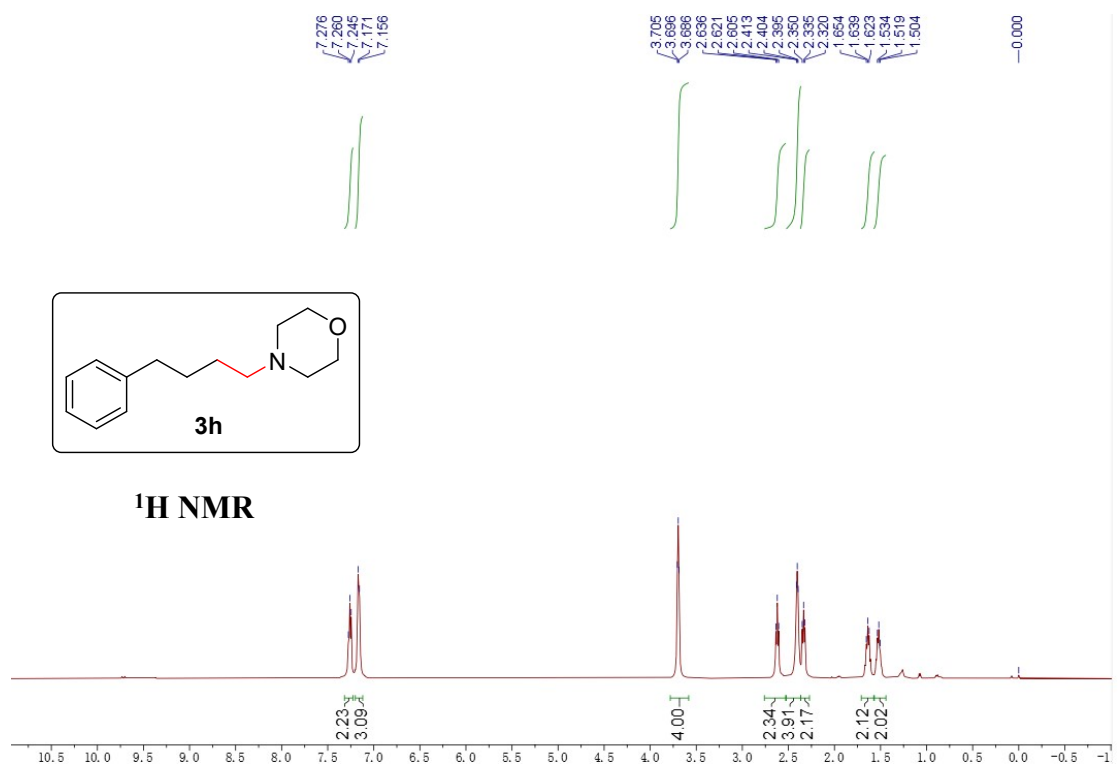

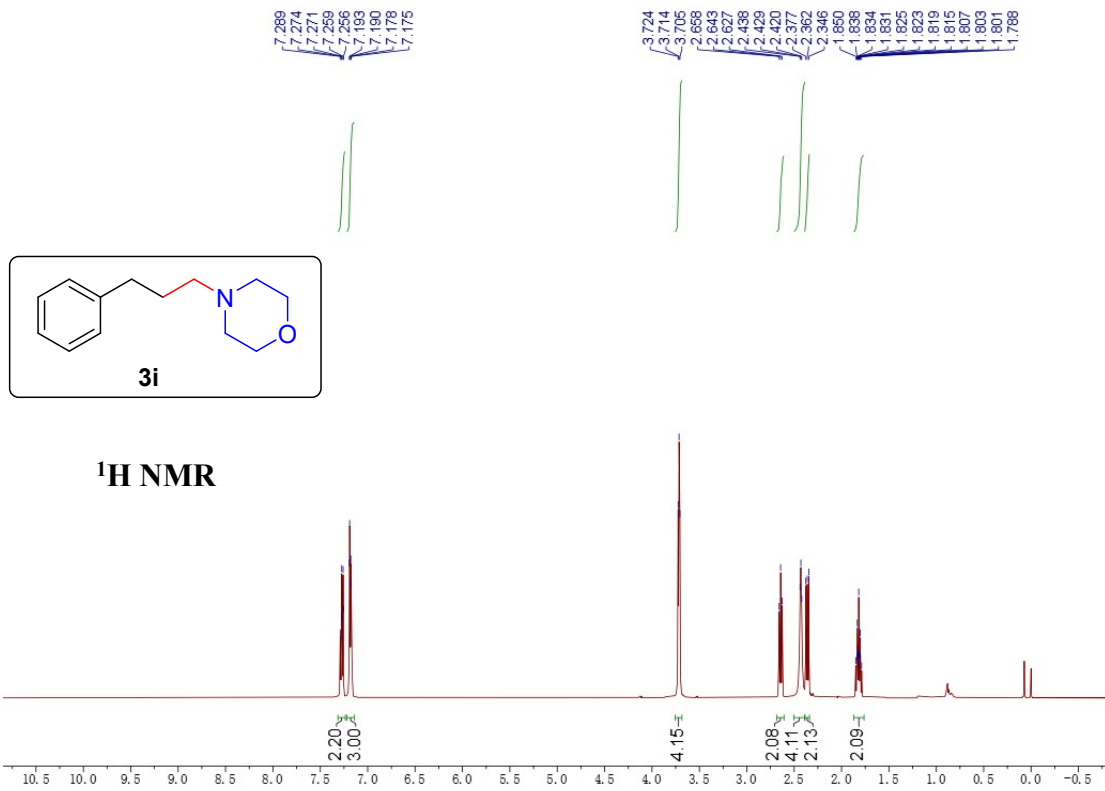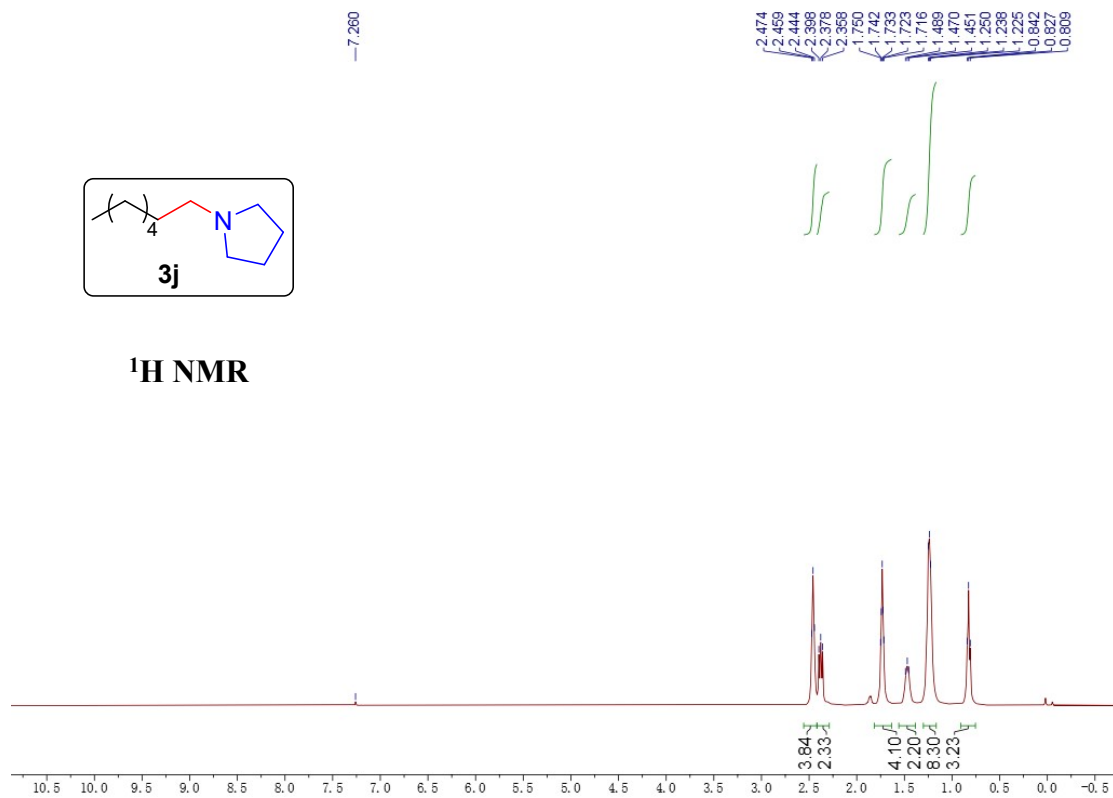

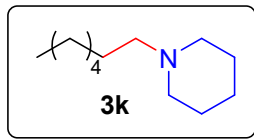

**<sup>1</sup>H NMR**

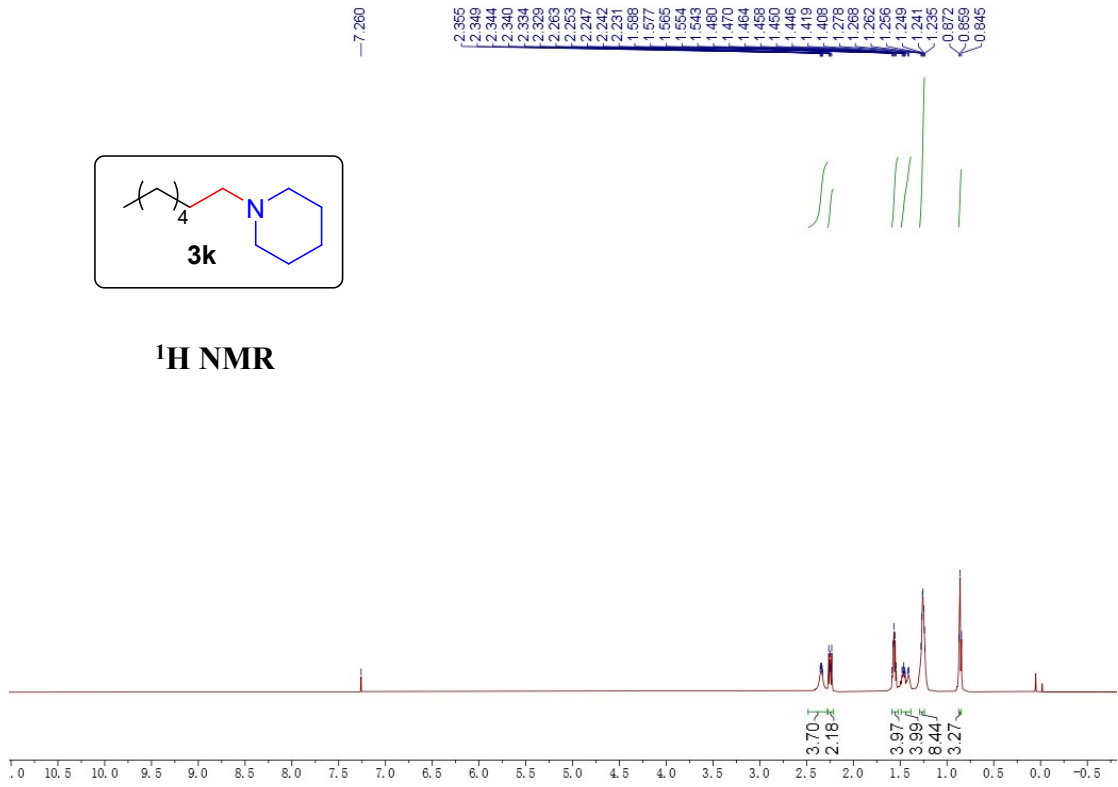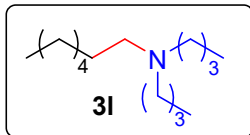

**<sup>1</sup>H NMR**

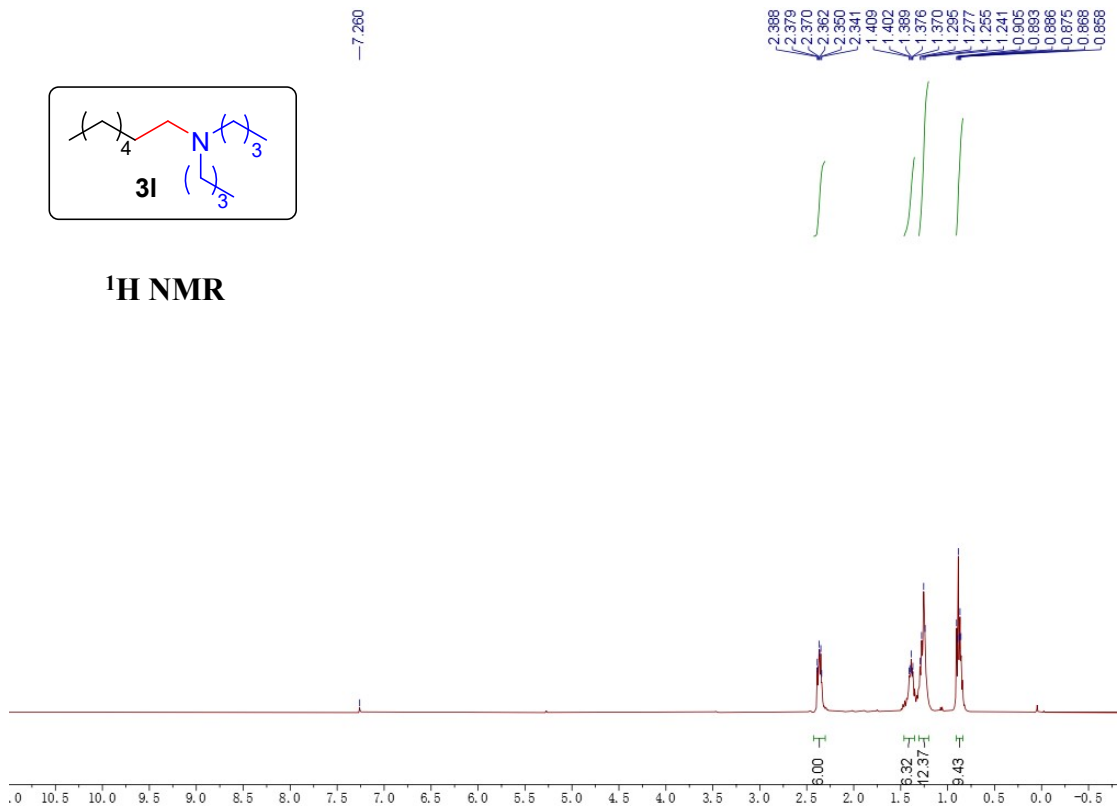

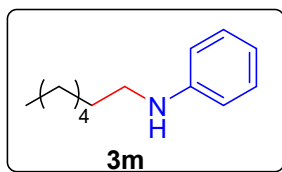

**<sup>1</sup>H NMR**

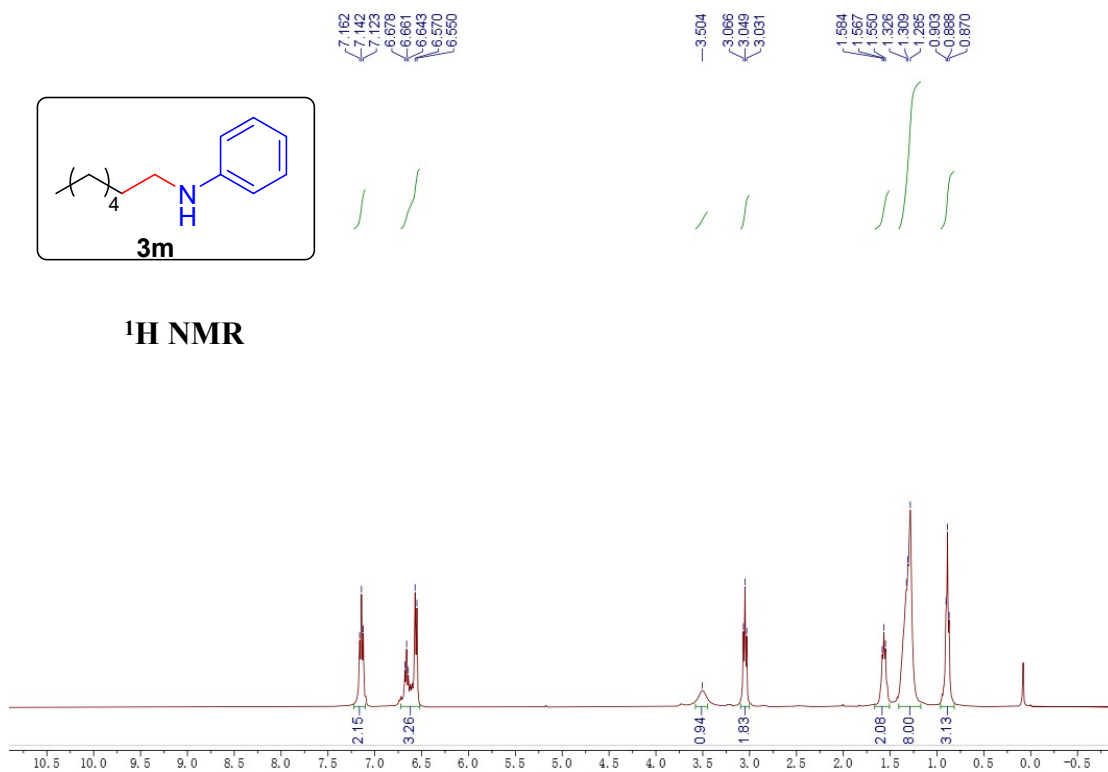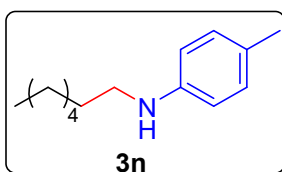

**<sup>1</sup>H NMR**

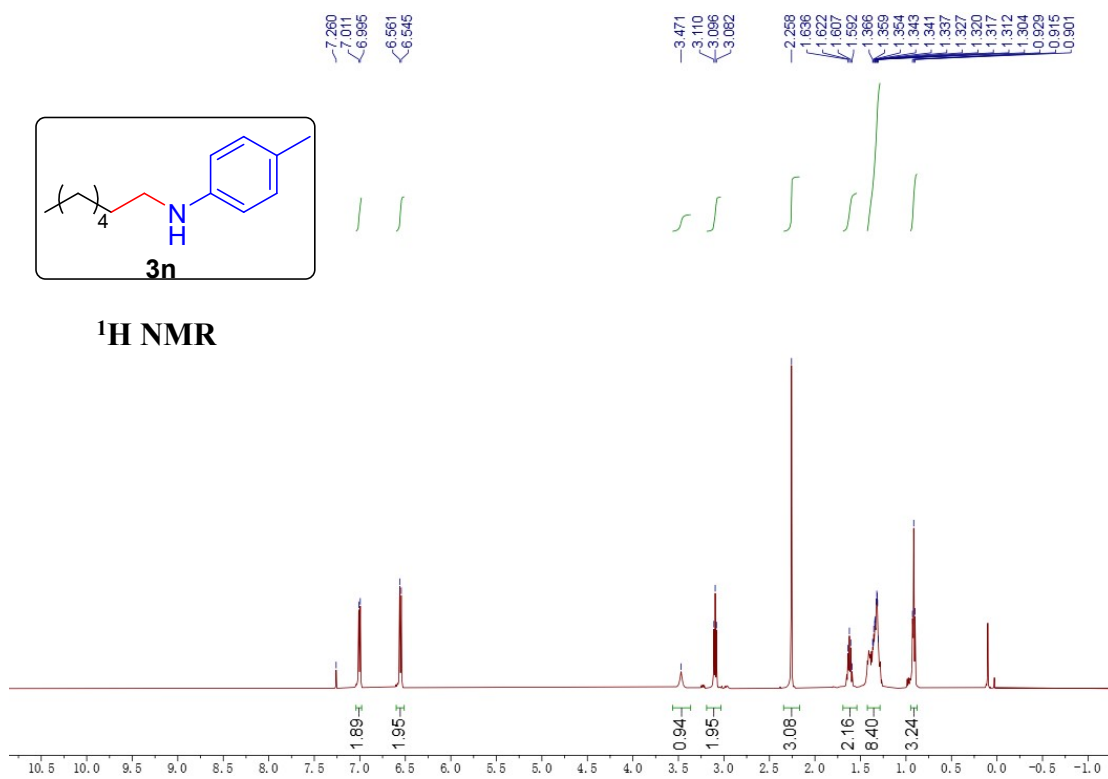

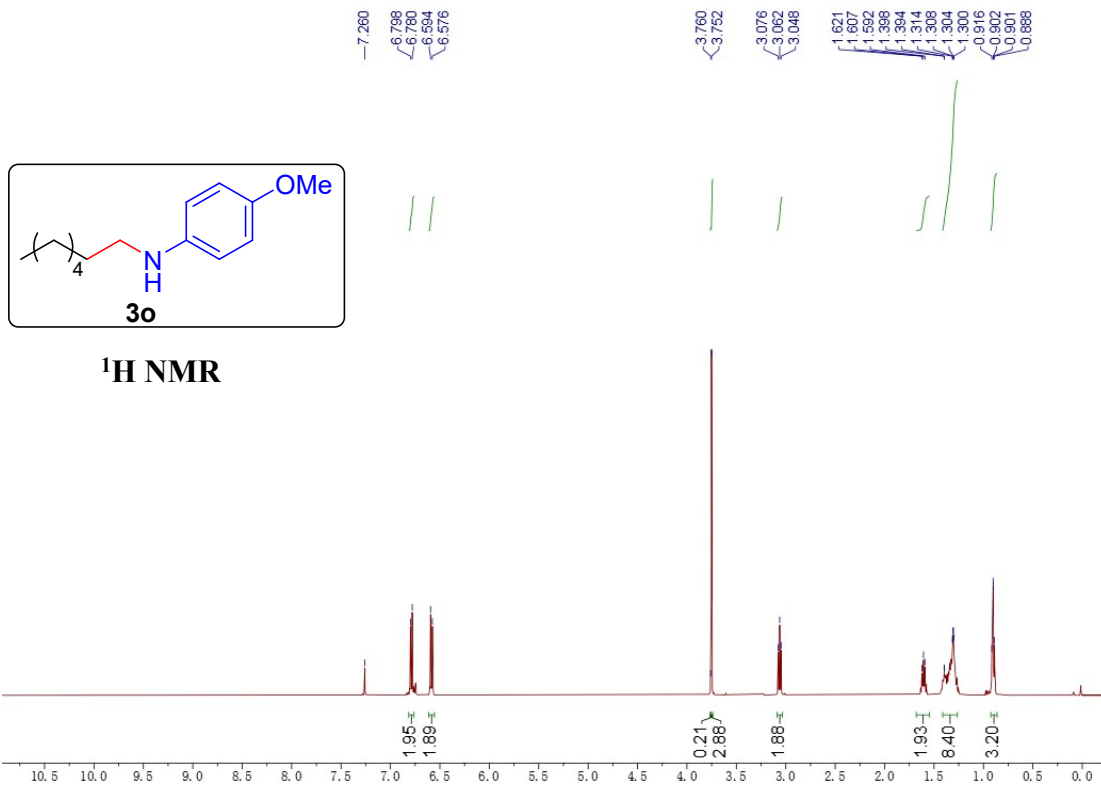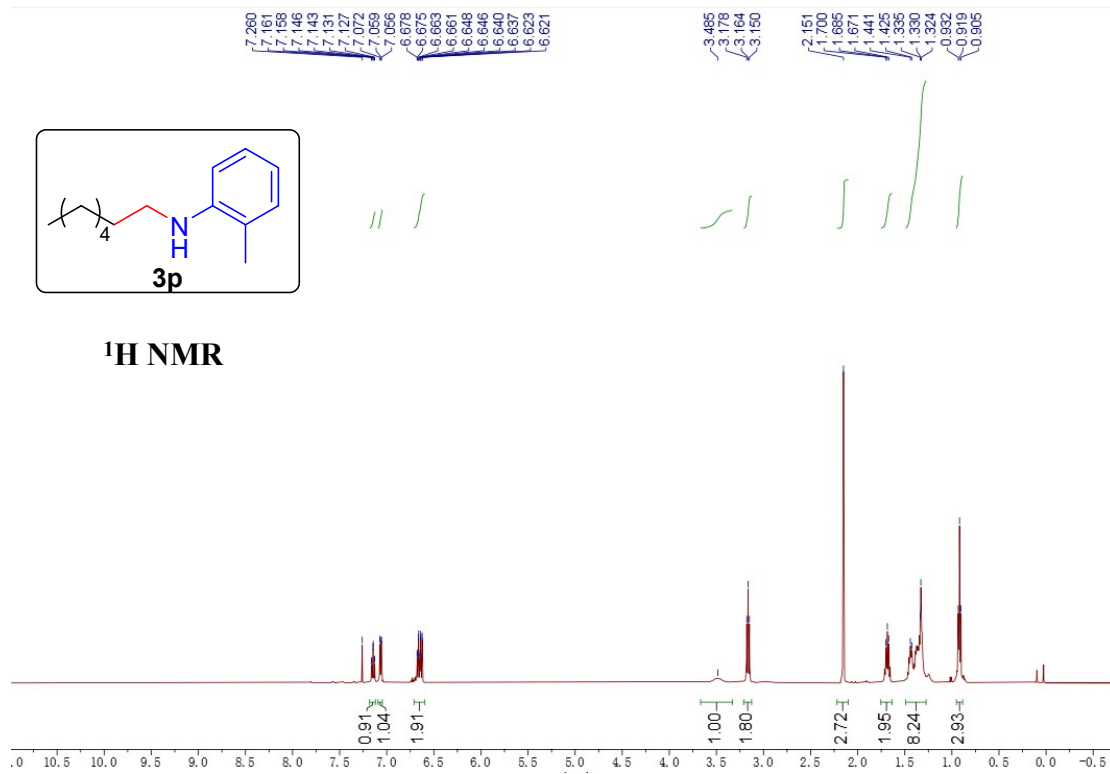



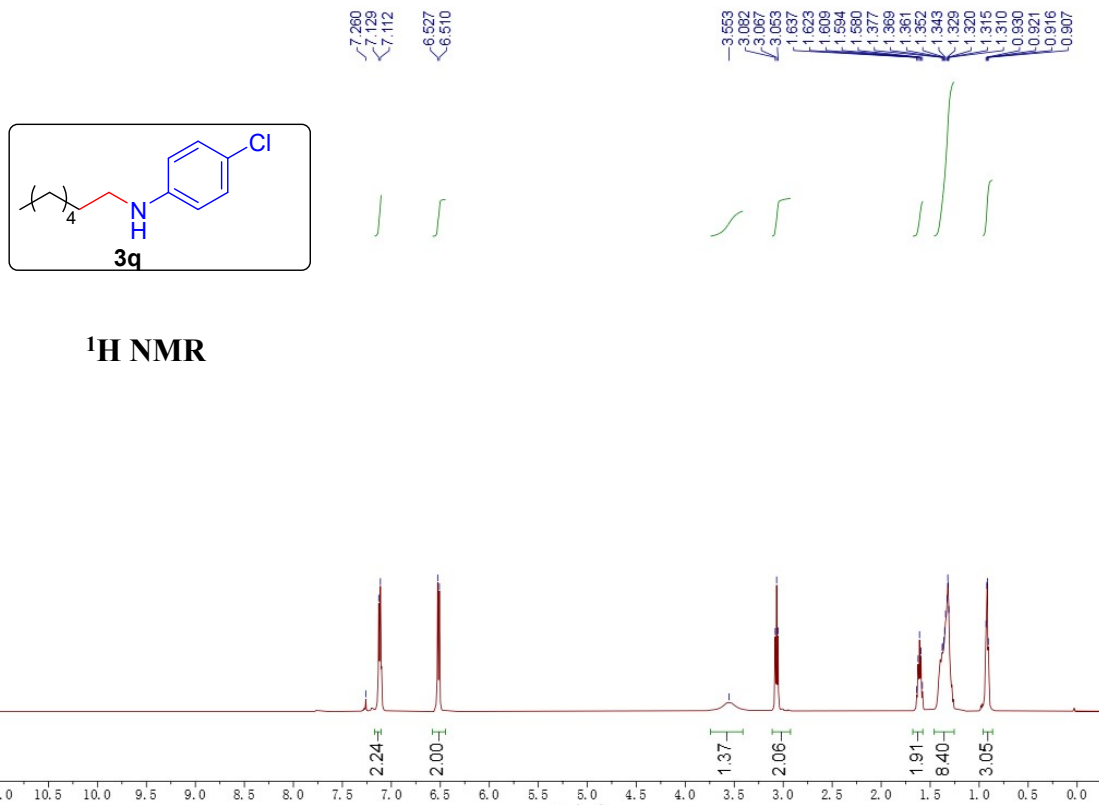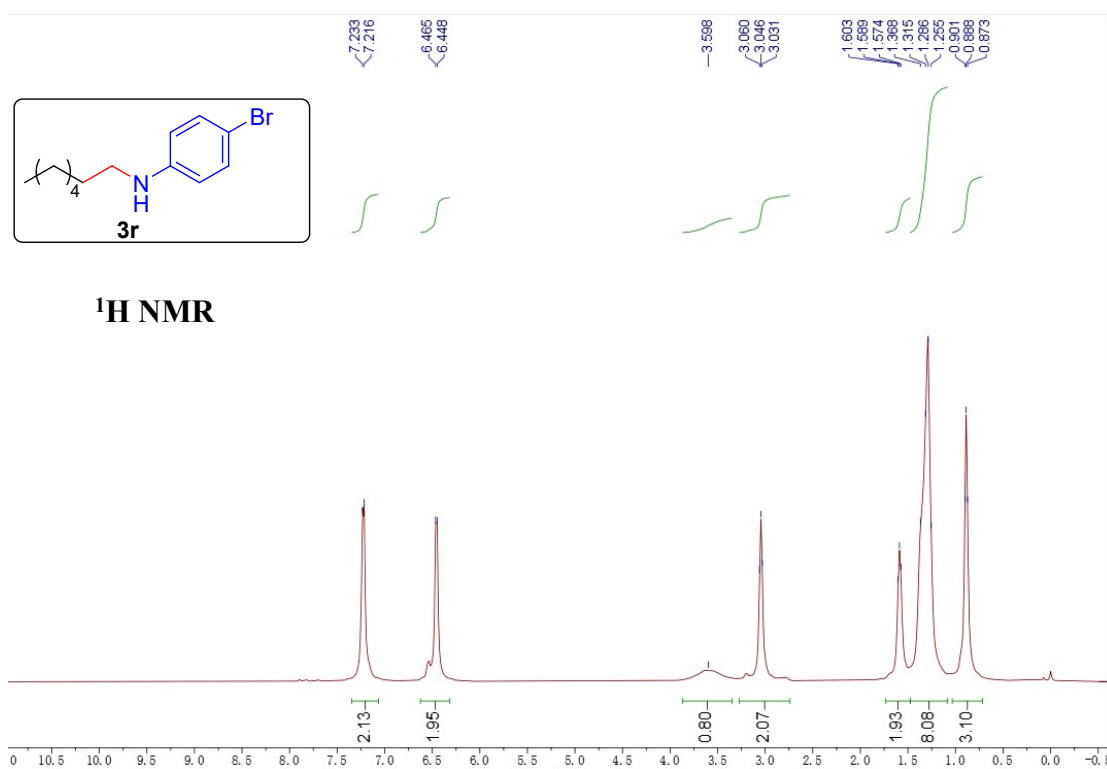

References:

[1] G. Liu, K. Huang, C. Cai, B. Cao, M. Chang, W. Wu and X. Zhang, *Chem.–Eur. J.*, 2011, **17**,

14559–14563.

- [2] A. Wetzel, S. Wöckel, M. Schelwies, M. K. Brinks, F. Rominger, P. Hofmann and M. Limbach, *Org. Lett.* 2013, **15**, 266–269.
- [3] X. Cui, X. Dai, Y. Deng and F. Shi, *Chem.–Eur. J.*, 2013, **19**, 3776–3776.
- [4] A. R. Sawkar, W.-C. Cheng, E. Beutler, C.-H. Wong, W. E. Balch and J. W. Kelly, *PNAS*, 2002, **99**, 15428–15433.
- [5] W. Li, W. Liu, D. K. Leonard, J. Rabeah, K. Junge, A. Brückner and M. Beller, *Angew. Chem. Int. Ed.* 2019, **58**, 10693–10697.
- [6] J. Bianga, N. Kopplin, J. Hülsmann, D. Vogt and T. Seidensticker, *Adv. Synth. Catal.* 2020, **362**, 4415–4424.
- [7] M. H. S. A. Hamid, C. L. Allen, G. W. Lamb, H. C. Maytum, A. C. Maxwell, A. J. A. Watson and J. M. J. Williams, *J. Am. Chem. Soc.* 2009, **131**, 1766–1774.
- [8] R. P. Rucker, A. M. Whittaker, H. Dang and G. Lalic, *J. Am. Chem. Soc.* 2012, **134**, 6571–6574.
- [9] S. Hwang, H. Park, Y. Kwon and S. Kim, *RSC Adv.* 2014, **4**, 60017–60024.
- [10] H. Egged and C. Djerassih, *J. Am. Chem. Soc.* 1973, **95**, 3710–3718.
- [11] M. Vellakkaran, K. Singh and D. Banerjee, *ACS Catal.* 2017, **7**, 8152–8158.
- [12] E. A. Artiukha, A. L. Nuzhdin, G. A. Bukhtiyarova, S. Yu. Zaytsev, P. E. Plyusnin, Y. V. Shubin and V. I. Bukhtiyarov *Catal. Sci. Technol.*, 2015, **5**, 4741–4745.
- [13] S. Semwal and J. Choudhury, *ACS Catal.* 2016, **6**, 2424–2428.
- [14] A. L. Nuzhdin, E. A. Artiukha, G. A. Bukhtiyarova, E. A. Derevyannikova, V. I. Bukhtiyarov, *Cat. Commun.* 2017, **102**, 108–113.
